# Supplementary material for: Morphology and genome size of Epipactis helleborine (L.) Crantz (Orchidaceae) growing in anthropogenic and natural habitats
Source: PeerJ. 2018 Dec 20;6:e5992. doi: 10.7717/peerj.5992 (PMC6304265; doi:10.7717/peerj.5992)
Supplement: Supplemental Information 1 [file peerj-06-5992-s004.xlsx]

## Sheet: Arkusz1
		AULL	CULL	AML	CML	AURL	CURL	ALLL	CLLL	ALRL	CLRL	Lli	AH	CH	AE	CE	LURLL	WURLL	LML	WML	LURL	WURL	LLRL	WLRL	LLLL	WLLL
A	A1	57.1299	33.8077	64.132	35.9615	61.2448	34.1982	73.4739	38.8817	65.8997	36.8905	9.52071	27.6741	20.497	18.1458	19.2396	12.6893	6.59172	13.5207	7.01775	12.0148	7.30473	14.9615	7.45266	14.0621	6.86686
A	A1	40.9392	30.6277	39.1683	31.1856	30.7254	28.5819	44.6409	32.0757	44.6409	32.0757	7.51245	10.7323	12.8628	15.7427	16.2903	11.3417	5.5895	12.1787	4.67619	11.6705	5.63932	11.6705	5.63932	12.2584	5.41348
A	A1	30.3436	24.9362	38.5205	27.4783	28.6755	24.5681	33.2422	28.1159	32.3104	24.9333	8.27826	11.7576	13.3594	12.828	16.2087	9.6058	4.85217	10.3333	5.3913	9.13044	4.90435	10.2029	5.50725	9.22029	5.17101
A	A1	29.3079	25.4638	27.4697	24.1618	31.6023	26.5483	35.4396	29.529	32.0422	28.7705	6.8285	8.768	12.0145	12.2529	15.471	9.68841	4.82126	9.3744	4.01208	9.62319	5.19807	11.6763	5.00483	11.2729	4.15459
A	A1	30.2978	26.3995	37.86	28.2113	0.001141	25.3557	32.8422	30.2655	30.973	27.2294	7.70619	13.0985	14.4098	13.1795	15.2732	9.40206	5.27062	10.6701	5.12887	9.5799	4.95876	11.433	4.69588	9.8866	4.98969
A	A1	26.6191	24.5862	30.8145	27.361	29.7573	25.2934	38.3765	29.6439	36.1334	28.4269	7.49423	13.5147	14.6887	15.0275	16.6769	9.53625	4.2019	10.825	3.88932	9.54907	4.89111	11.6987	5.08839	10.8071	4.98847
A	A1	40.9392	30.6277	39.1683	31.1856	30.7254	28.5819	44.6409	32.0757	44.6409	32.0757	7.51245	10.7323	12.8628	15.7427	16.2903	11.3417	5.5895	12.1787	4.67619	11.6705	5.63932	11.6705	5.63932	12.2584	5.41348
A	A1	29.3079	25.4638	27.4697	24.1618	31.6023	26.5483	35.4396	29.529	32.0422	28.7705	6.8285	8.768	12.0145	12.2529	15.471	9.68841	4.82126	9.3744	4.01208	9.62319	5.19807	11.6763	5.00483	11.2729	4.15459
A	A2	32.3444	25.9214	32.8922	27.4641	30.135	24.3986	41.2315	31.066	44.957	32.5447	7.28316	13.0831	14.659	16.056	16.7844	10.0044	4.72964	11.2095	4.06533	8.90973	5.15118	11.7082	5.15559	12.6683	4.99007
A	A2	23.1673	25.4139	22.8052	24.7764	24.3423	24.2339	35.5146	27.7224	33.9755	27.4036	7.68637	12.0717	13.9923	11.0071	14.2159	9.10026	4.10797	9.51928	3.73265	9.30848	3.78149	9.96915	5.32905	10.0746	4.68895
A	A2	31.6294	25.8226	34.6071	27.5291	32.1466	25.8043	37.6876	30.4404	34.6356	31.3761	7.21407	8.88533	12.1346	13.1269	16.37	9.94495	4.77676	10.6177	5.04893	9.56575	5.45566	12.0489	5.2263	12.3486	4.67278
A	A2	44.6191	31.4935	50.2934	31.5349	40.7524	28.6021	60.0057	40.2171	66.6693	42.876	9.01034	18.2885	16.9199	18.5562	17.6667	12.0258	5.49612	11.3075	5.81912	10.9587	5.04393	15.1654	6.13695	15.876	7.10594
A	A2	39.7481	30.1212	61.9945	36.1608	37.8659	29.4575	45.5986	33.7152	46.1159	31.322	8.41091	15.5922	16.282	17.5673	17.995	11.008	5.47508	13.9796	6.54641	10.8317	5.14459	12.8808	5.30983	12.0655	5.74222
A	A2	28.2231	24.0437	35.8509	26.6092	28.1868	24.6324	33.7048	28.1208	34.2448	26.874	7.78406	13.3537	14.8149	14.6566	17.2468	9.11568	4.91517	9.20051	5.42417	9.01285	4.61182	10.1748	4.80463	9.73008	4.8946
A	A2	35.9197	27.8182	41.2779	30.7358	36.8652	27.4119	40.5455	31.9432	37.0037	30.8125	8.92046	16.4906	16.5142	17.6665	18.6534	9.86364	5.44602	11.1335	5.59091	9.80398	5.6108	12.017	4.98295	10.5369	4.86364
A	A3	26.1346	23.9695	28.0065	24.5921	24.4889	23.1417	26.208	25.2457	25.1857	25.2767	6.56011	10.0812	13.1584	11.0637	16.1188	8.82156	4.5229	9.13168	4.38931	7.94847	4.45849	9.55153	3.85496	9.08397	4.25572
A	A3	22.8286	21.8048	23.107	22.5259	24.7153	22.7291	22.0661	24.0797	21.405	22.7231	6.46215	7.82765	11.2311	10.8221	15.5837	8.10956	4.28685	8.9004	3.8247	8.49004	4.01195	9.03586	3.66932	8.17928	3.87052
A	A3	56.9608	36.9086	47.5163	34.3143	51.4853	33.9886	54.2914	38.1686	59.6539	40.1314	8.34286	22.2678	19.4629	22.0535	20.62	13.1543	6.54286	13.3743	5.26	11.3457	6.53429	14.3771	5.71143	13.2857	6.18857
A	A3	56.7642	34.425	56.2178	36.875	53.46	33.5906	64.3975	41.6313	52.4312	38.5969	11.0344	21.2549	19.5719	26.2398	23.0875	12.7844	6.31562	14.6312	5.75	13.0281	6.50625	16.175	6.3875	13.8688	5.425
A	A3	22.3706	25.8051	32.3439	26.9013	32.3451	26.638	42.365	32.8658	38.9566	32.0759	7.47342	12.7201	14.2937	12.8585	15.6456	9.91899	4.11139	10.0734	4.66835	9.97215	5.22025	11.3114	5.77215	11.319	5.18481
A	A3	45.3968	29.8928	44.8949	31.4065	49.7631	31.2668	54.3625	35.3292	56.2254	34.985	9.63342	20.8236	17.9701	23.3223	21.0175	11.0648	6.39651	12.4763	5.05736	10.5237	6.88279	13.4813	6.14963	13.6409	6.70324
A	A4	36.388	26.8491	49.3478	29.9949	34.3847	26.1552	44.1463	29.9255	41.5304	29.3087	7.97224	15.406	15.505	15.4545	16.6564	9.91519	5.54099	10.8198	6.18093	10.1285	5.45104	11.4135	5.51786	11.0511	5.42277
A	A4	28.2231	24.0437	35.8509	26.6092	28.1868	24.6324	33.7048	28.1208	34.2448	26.874	7.78406	13.3537	14.8149	14.6566	17.2468	9.11568	4.91517	9.20051	5.42417	9.01285	4.61182	10.1748	4.80463	9.73008	4.8946
A	A4	42.0462	29.6721	49.2193	31.8726	39.1786	28.458	45.7609	35.1897	42.8419	32.8997	8.48509	18.6158	17.271	18.4825	17.5312	11.019	5.79133	12.0596	5.99187	10.458	5.66396	12.9458	5.5393	12.5637	5.17886
A	A4	44.6191	31.4935	50.2934	31.5349	40.7524	28.6021	60.0057	40.2171	66.6693	42.876	9.01034	18.2885	16.9199	18.5562	17.6667	12.0258	5.49612	11.3075	5.81912	10.9587	5.04393	15.1654	6.13695	15.876	7.10594
A	A4	39.7481	30.1212	61.9945	36.1608	37.8659	29.4575	45.5986	33.7152	46.1159	31.322	8.41091	15.5922	16.282	17.5673	17.995	11.008	5.47508	13.9796	6.54641	10.8317	5.14459	12.8808	5.30983	12.0655	5.74222
A	A4	46.6435	30.9812	53.0781	33.7482	47.266	29.3054	39.3285	32.6252	50.4552	36.7496	9.14906	19.3817	17.8495	22.5177	22.6483	10.7439	6.33285	12.5962	6.15051	10.1389	6.80463	10.5702	5.82634	14.0376	5.70478
N	N1	29.2429	25.9051	33.6624	27.9795	33.9698	27.4308	42.5194	31.4385	44.192	30.6487	7.51795	9.5881	12.8282	13.7689	15.5487	9.82308	4.40513	11.1	3.99744	10.6795	4.80513	11.7077	4.84103	11.3872	5.10256
N	N1	33.3292	27.2992	3.97545	28.9554	37.416	29.147	38.8038	30.3858	38.4346	30.3255	6.48294	9.79567	12.5066	11.0126	15.4698	8.98688	5.90814	10.8635	5.21522	10.2073	5.33596	10.9055	5.03674	11.2572	4.60892
N	N1	24.3218	23.0091	27.8349	25.1415	25.2465	23.4909	27.6584	23.2352	28.752	26.048	5.98173	8.61429	11.8356	12.947	15.3265	7.9863	4.05251	9.54338	3.92694	8.50685	4.34018	8.67808	4.49543	9.55936	4.32877
N	N1	32.4414	24.9187	33.4277	27.2031	32.2534	26.5	33.7002	27.7594	32.8872	27.5531	6.25	8.37549	12.1562	10.6646	13.825	9.30312	4.93125	10.775	4.00938	9.59375	5.03125	10.3469	4.65	10.1156	4.55625
N	N1	27.2752	24.8753	37.8578	28.199	34.1882	26.0504	35.7386	28.8873	29.4308	27.8393	8.02398	11.2813	13.1415	14.6507	16.6475	9.53237	4.31175	10.6259	5.13189	9.49161	5.39808	10.9329	4.77938	11.1271	3.71703
N	N1	26.5791	22.2241	34.7146	27.9345	27.3716	23.9448	36.2824	30.0069	36.2943	28.0931	6.62069	7.88645	11.1	15.2265	16.3621	7.74828	4.96897	11.0035	4.67931	9.22414	4.49655	11.3138	4.63793	10.5379	4.98965
N	N1	42.875	28.7033	49.6122	31.6	42.0406	28.2167	54.6589	33.68	50.7644	34.01	7.27333	13.72	14.8333	16.3989	17.0733	10.4167	5.90667	12.34	5.54667	10.6567	5.75333	12.1967	6.30667	12.6967	5.61
N	N1	31.8755	26.325	38.5661	29.1237	33.0622	26.9078	30.3429	27.2076	31.104	27.3124	6.69392	9.03094	12.0252	14.089	17.088	10.1342	5.13417	10.9224	4.94759	9.49266	5.40252	10.0419	4.66876	4.55765	10.7254
N	N1	36.901	26.9883	40.0775	29.5128	33.7911	26.5478	34.5627	29.5315	34.5371	27.7762	6.92774	10.1026	12.8112	14.6397	17.979	9.97902	5.62238	10.7716	5.38462	5.34033	9.74592	11.2354	4.78089	10.7925	4.29371
N	N1	26.5791	22.2241	34.7146	27.9345	27.3716	23.9448	36.2824	30.0069	36.2943	28.0931	6.62069	7.88645	11.1	15.2265	16.3621	7.74828	4.96897	11.0035	4.67931	9.22414	4.49655	11.3138	4.63793	10.5379	4.98965
N	N1	42.875	28.7033	49.6122	31.6	42.0406	28.2167	54.6589	33.68	50.7644	34.01	7.27333	13.72	14.8333	16.3989	17.0733	10.4167	5.90667	12.34	5.54667	10.6567	5.75333	12.1967	6.30667	12.6967	5.61
N	N1	28.6071	25.7845	31.9933	27.459	29.4139	26.7869	28.3045	29.267	24.5933	27.1288	6.88056	9.69526	14.1077	11.4393	15.7143	9.71429	5.2459	10.2108	5.22248	9.99532	5.27166	10.7635	4.59719	11.0187	4.05386
N	N2	27.1237	25.1003	38.6161	30.2249	30.9684	25.8784	34.8722	28.6991	32.1117	27.8511	7.41641	11	11.6109	16.0346	16.7568	9.79027	4.01216	12.1884	4.28875	10.0365	4.52888	11.5806	4.32219	11.307	4.25532
N	N2	40.0409	27.3405	48.8327	30.3999	46.5833	28.2679	43.3439	29.8822	48.1624	32.3454	7.58341	13.0383	14.6001	13.8256	16.2022	10.2061	5.71639	11.3346	5.77772	10.4343	6.23651	11.0501	5.54956	12.4411	5.64279
N	N2	31.836	25.0085	35.1096	26.7301	24.1833	22.7725	33.7069	27.0788	35.0507	27.8444	6.64228	9.35029	12.4652	13.2288	15.3767	9.0612	5.39381	10.3414	4.93051	8.62716	4.3843	9.75859	4.9744	10.5633	4.55986
N	N2	36.8215	26.1813	50.6574	32.4249	45.07	30.0855	45.9009	32.3135	45.8707	31.5725	7.37824	16.8649	16.0855	16.3253	17.4482	9.74611	5.60622	12.7047	5.42487	11.0104	5.94301	12.329	5.17098	12.4404	5.05959
N	N2	28.0057	24	37.602	27.748	34.6571	25.9455	38.3903	30.1766	43.1601	32.2675	8.43377	9.27003	12.7351	19.6799	18.4987	8.92468	4.36623	11.5844	4.18182	10.0156	5.17143	11.4182	5.1974	11.5325	5.49351
N	N2	40.6259	28.3528	44.3035	31.6498	40.8639	29.0736	33.1933	27.3249	38.1332	28.632	9.36802	16.434	15.7487	17.5681	18.1472	9.8401	5.91371	12.2487	4.95178	11.1802	5.78173	10.0152	4.73858	10.5914	5.22843
N	N2	26.5078	22.6327	28.3428	24.1126	28.4154	24.1984	23.852	23.5496	22.9359	22.3646	6.64343	8.52985	11.5952	13.692	15.2037	7.98928	4.59517	9.24665	4.48794	8.874	4.73726	8.21984	4.08311	8.26273	4.17158
N	N2	25.2835	23.8438	27.5686	25.4714	25.3876	24.7292	29.6139	27.6016	25.6456	26.875	5.64583	5.82886	10.6146	9.59269	13.2422	8.78385	4.49219	10.4088	3.875	9.29427	4.10677	10.0391	4.04427	10.1016	3.4974
N	N2	40.6259	28.3528	44.3035	31.6498	40.8639	29.0736	33.1933	27.3249	38.1332	28.632	9.36802	16.434	15.7487	17.5681	18.1472	9.8401	5.91371	12.2487	4.95178	11.1802	5.78173	10.0152	4.73858	10.5914	5.22843
N	N2	31.836	25.0085	35.1096	26.7301	24.1833	22.7725	33.7069	27.0788	35.0507	27.8444	6.64228	9.35029	12.4652	13.2288	15.3767	9.0612	5.39381	10.3414	4.93051	8.62716	4.3843	9.75859	4.9744	10.5633	4.55986
N	N2	34.0688	27.0979	38.1229	29.0119	34.1215	26.8926	36.139	29.3938	40.284	30.0764	7.06683	12.4464	14.3747	11.3117	14.1098	10.4463	4.63962	11.4439	4.84725	10.062	5.00955	10.6444	4.98568	11.4463	4.8926
N	N3	24.4295	23.5313	30.9806	25.3791	25.0893	24.0418	30.1773	26.8537	32.2606	27.5672	5.71045	8.75919	12.397	10.3765	14.4657	9.02388	4.35522	9.80597	4.56716	8.92836	4.47164	9.83284	4.35224	9.91045	4.60299
N	N3	28.4748	24.2948	31.3026	25.9345	26.4998	23.697	30.6819	25.8424	33.2264	26.4852	7.17912	12.7615	14.3644	12.3852	15.1116	7.89151	5.11566	9.826	4.86796	8.30706	5.28557	8.92323	4.88025	9.6868	4.96008
N	N3	25.87	23.5274	31.8542	26.3091	25.2938	23.7476	29.2048	26.8302	29.5405	26.4879	7.28799	13.1814	14.5345	11.1492	14.9967	8.29082	4.29475	9.77327	4.92479	8.3257	4.37759	9.72749	4.51711	9.67081	4.52147
N	N3	27.6517	25.1321	29.0658	27.9245	28.828	25.0063	28.8923	25.7327	26.7815	26.5692	7.19182	9.74531	13.6698	11.9324	14.8868	9.21698	4.59748	11.8019	3.4717	9.58491	4.51887	10.1258	4.27987	9.82076	4.08805
N	N3	27.2914	21.6676	29.079	22.7088	27.7589	21.9341	26.18	23.8159	32.8591	25.9231	7.03571	13.8789	15.0687	10.9985	15.7005	7.53571	4.86813	7.31593	5.23901	7.63462	5.03022	8.4533	4.19231	9.47527	4.92308
N	N3	19.2949	19.1488	12.1841	15.1405	19.6612	19.124	23.656	21.9504	27.3632	23.8905	5.96074	12.9787	15.4628	8.23202	12.4008	7.04132	3.6219	5.79132	2.84091	7.29339	3.65702	7.64463	4.38016	8.67975	4.40083
N	N3	27.9048	25.3091	37.4183	29.6347	28.0523	25.1241	30.3961	26.6534	26.139	26.5527	7.06323	8.79783	12.5012	12.7314	16.0913	8.87588	4.76112	11.6019	4.36066	9.14052	4.637	10.0937	4.40515	10.185	4.24122
N	N3	35.1729	27.0242	42.2396	29.6894	40.4789	29.7203	38.5894	30.7313	36.4608	29.5595	7.97797	9.99656	12.9758	20.1615	18.5683	9.99339	5.5815	11.3348	5.57709	9.93833	6.26211	10.7071	5.48678	10.837	5.50661
N	N4	32.4494	23.8136	36.6428	26.9862	34.943	25.9122	29.7949	26.1864	38.6041	28.8291	5.65038	7.35609	11.3338	11.7256	14.5805	8.37972	5.49371	10.3072	5.09586	9.28056	5.68749	10.1278	4.42589	11.0163	5.3556
N	N4	42.7673	28.07	50.1257	31.6957	39.1062	28.5966	43.9733	31.1642	43.8003	30.529	6.88406	11.8037	13.8647	13.4166	16.3913	10.2464	6.27295	12.0169	5.6401	10.7005	5.63044	11.5314	5.4372	11.4976	5.60386
N	N4	33.6158	25.4302	33.102	27.4159	33.6759	25.3447	32.5257	28.4558	33.9612	27.3333	7.8433	11.797	14.0769	12.3627	15.1652	9.09971	5.46154	10.6638	4.44444	9.30484	5.58974	10.5869	3.78917	10.5242	4.33048
N	N4	28.1442	24.7695	36.9622	29.1168	30.1333	25.5	34.1098	31.2994	31.0284	29.1287	7.7485	7.7172	11.2485	12.2391	15.0988	8.4012	4.90419	11.3443	4.34132	9.61078	4.43713	11.7186	4.17665	10.3233	4.35928
N	N4	36.2898	27.8599	39.8183	27.9188	35.4577	27.3754	33.0936	28.5658	34.4267	28.1288	8.27171	9.46653	12.2857	16.0358	17.8375	9.96359	5.63305	10.6583	5.34174	9.94958	5.15126	10.3473	4.72269	11.0476	4.38095
N	N4	30.8835	25.0801	31.1735	25.4503	28.9735	24.8729	33.8997	27.6215	31.8466	27.1519	6.96409	11.8174	13.6519	14.1269	16.2901	9.02486	5.10497	9.79558	4.61878	8.9116	5.14088	10.4917	4.73481	10.5691	4.46409
N	N4	30.6181	24.4111	31.5629	26.2417	33.4923	25.7444	35.7647	28.7944	33.9695	28.1167	6.45	10.054	12.3	11.4074	14.7028	8.73889	5.075	10.4056	4.29444	9.11111	5.90556	11.1972	4.87222	11.075	4.33889
N	N4	42.9673	29.07	50.1257	31.6957	39.1062	28.5966	43.9733	31.1642	43.8003	30.529	6.98406	11.8037	13.8647	13.4166	17.3913	10.2464	6.27295	12.0169	5.6401	10.7005	5.73043	11.5314	5.4372	11.4976	5.60386
N	N4	42.7673	28.07	50.1257	31.6957	39.1062	28.5966	43.9733	31.1642	43.8003	30.529	6.88406	11.8037	13.8647	13.4166	16.3913	10.2464	6.27295	12.0169	5.6401	10.7005	5.63044	11.5314	5.4372	11.4976	5.60386
